# Supplementary material for: Mesogen-jacketed liquid crystalline polymers with peripheral oligo(ethylene oxide) chains: phase structure and thermoresponsive behavior
Source: Royal Society of Chemistry journal article supplement (doi:10.1039/c4py00371c), 2014-01-01
Supplement: c4py00371c1.pdf [file c4py00371c1.pdf]

mono-2EOBCS:  $^1\text{H}$  NMR ( $\text{CDCl}_3$ , TMS),  $\delta$ : 8.23 (s, 1H, Ar-**H**); 7.92-7.89 (m, 2H, Ar-**H**); 7.38 (m, 1H, -**CH=CH**<sub>2</sub>); 7.37-7.35 (d, 4H, Ar-**H**); 6.94-6.92 (d, 4H, Ar-**H**); 5.74-5.70 (d, 1H, -**CH=CH**<sub>2</sub>); 5.41-5.38 (d, 1H, -**CH=CH**<sub>2</sub>); 5.31-5.29 (d, 4H, -**COOCH**<sub>2</sub>-); 4.16-4.14 (t, 4H, Ar**OCH**<sub>2</sub>-); 3.88-3.85 (t, 4H, Ar**OCH**<sub>2</sub>**CH**<sub>2</sub>-); 3.73-3.71 (t, 4H, Ar**OCH**<sub>2</sub>**CH**<sub>2</sub>**OCH**<sub>2</sub>-); 3.59-3.57 (t, 4H, -**CH**<sub>2</sub>**OCH**<sub>3</sub>); 3.39 (s, 6H, -**OCH**<sub>3</sub>).

$^{13}\text{C}$  NMR ( $\text{CDCl}_3$ , TMS),  $\delta$ : 59.78 (-**OCH**<sub>3</sub>); 66.96 (-**COOCH**<sub>2</sub>-); 67.41 (Ar**OCH**<sub>2</sub>-); 69.68 (Ar**OCH**<sub>2</sub>**CH**<sub>2</sub>**O**-); 70.71-70.75 (-**OCH**<sub>2</sub>**CH**<sub>2</sub>**OCH**<sub>3</sub>); 71.89-71.94 (-**CH**<sub>2</sub>**OCH**<sub>3</sub>); 113.89-115.47 (aromatic **C** ortho to -**OCH**<sub>2</sub>**CH**<sub>2</sub>**O**-); 117.78 (-**CH=CH**<sub>2</sub>); 127.30-127.51 (aromatic **C** ortho to -**CH=CH**<sub>2</sub> and -**C=O**); 127.86-127.96 (aromatic **C** meta to -**OCH**<sub>2</sub>**CH**<sub>2</sub>**O**-); 129.41-129.51 (aromatic **C** para to -**CH=CH**<sub>2</sub> and aromatic **C** meta to -**CH=CH**<sub>2</sub>); 130.94-131.15 (aromatic **C-CH**<sub>2</sub>-); 134.00 (aromatic **C-C=O**); 135.61 (-**CH=CH**<sub>2</sub>); 139.57 (aromatic **C-CH=CH**<sub>2</sub>); 158.99 (aromatic **C-OCH**<sub>2</sub>**CH**<sub>2</sub>**O**-); 165.58-166.55 (**C=O**).

Mass Spectrometry (MS) (m/z) [M] Calcd for C<sub>34</sub>H<sub>40</sub>O<sub>10</sub>, 608.7; found, 608.2.

mono-3EOBCS:  $^1\text{H}$  NMR ( $\text{CDCl}_3$ , TMS),  $\delta$ : 8.22 (s, 1H, Ar-**H**); 7.94-7.87 (m, 2H, Ar-**H**); 7.42 (m, 1H, -**CH=CH**<sub>2</sub>); 7.38-7.36 (d, 4H, Ar-**H**); 6.93-6.91 (d, 4H, Ar-**H**); 5.74-5.70 (d, 1H, -**CH=CH**<sub>2</sub>); 5.40-5.37 (d, 1H, -**CH=CH**<sub>2</sub>); 5.30-5.28 (d, 4H, -**COOCH**<sub>2</sub>-); 4.16-4.14 (t, 4H, Ar**OCH**<sub>2</sub>-); 3.86 (t, 4H, Ar**OCH**<sub>2</sub>**CH**<sub>2</sub>-); 3.74-3.64 (m, 12H, Ar**OCH**<sub>2</sub>**CH**<sub>2</sub>**OCH**<sub>2</sub>**CH**<sub>2</sub>**OCH**<sub>2</sub>-); 3.55 (t, 4H, -**CH**<sub>2</sub>**OCH**<sub>3</sub>-); 3.37 (s, 6H, -**OCH**<sub>3</sub>).

$^{13}\text{C}$  NMR ( $\text{CDCl}_3$ , TMS),  $\delta$ : 58.36 (-**OCH**<sub>3</sub>); 66.89 (-**COOCH**<sub>2</sub>-); 67.35 (Ar**OCH**<sub>2</sub>-); 69.56 (Ar**OCH**<sub>2</sub>**CH**<sub>2</sub>**O**-); 70.41-70.73 (Ar**OCH**<sub>2</sub>**CH**<sub>2</sub>**OCH**<sub>2</sub>**CH**<sub>2</sub>**OCH**<sub>2</sub>-); 71.85 (-**CH**<sub>2</sub>**OCH**<sub>3</sub>); 113.86-115.34 (aromatic **C** ortho to -**OCH**<sub>2</sub>**CH**<sub>2</sub>**O**-); 117.65 (-**CH=CH**<sub>2</sub>); 127.27-127.44 (aromatic **C** ortho to -**CH=CH**<sub>2</sub> and -**C=O**); 127.79-127.89 (aromatic **C** meta to -**OCH**<sub>2</sub>**CH**<sub>2</sub>**O**-); 129.29-129.48 (aromatic **C** para to -**CH=CH**<sub>2</sub> and aromatic **C** meta to -**CH=CH**<sub>2</sub>); 130.82-131.11 (aromatic **C-CH**<sub>2</sub>-); 133.92 (aromatic **C-C=O**); 135.50 (-**CH=CH**<sub>2</sub>); 139.50 (aromatic **C-CH=CH**<sub>2</sub>); 158.91 (aromatic **C-OCH**<sub>2</sub>**CH**<sub>2</sub>**O**-); 165.44-166.43 (**C=O**).

Mass Spectrometry (MS) (m/z) [M] Calcd for C<sub>38</sub>H<sub>48</sub>O<sub>12</sub>, 696.8; found, 696.3.

di-1EOBCS:  $^1\text{H}$  NMR ( $\text{CDCl}_3$ , TMS),  $\delta$ : 8.26 (s, 1H, Ar-**H**); 7.98-7.93 (m, 2H, Ar-**H**); 7.46-7.39 (m, 1H, -**CH=CH**<sub>2</sub>); 6.61 (s, 4H, Ar-**H**); 6.51 (s, 2H, Ar-**H**); 5.77-5.73 (d, 1H, -**CH=CH**<sub>2</sub>); 5.43-5.40 (d, 1H, -**CH=CH**<sub>2</sub>); 5.30-5.26 (d, 4H, -**COOCH**<sub>2</sub>-); 4.10 (t, 8H, Ar**OCH**<sub>2</sub>-); 3.74 (t, 8H, -**CH**<sub>2</sub>**OCH**<sub>3</sub>); 3.44 (s, 12H, -**OCH**<sub>3</sub>).

$^{13}\text{C}$  NMR ( $\text{CDCl}_3$ , TMS),  $\delta$ : 59.25 (-**OCH**<sub>3</sub>); 67.03 (-**COOCH**<sub>2</sub>-); 67.41 (Ar**OCH**<sub>2</sub>-); 70.96 (-**CH**<sub>2</sub>**OCH**<sub>3</sub>); 101.47 (aromatic **C** para to -**COOCH**<sub>2</sub>-); 107.10 (aromatic **C** ortho to -**COOCH**<sub>2</sub>- and -**OCH**<sub>2</sub>**CH**<sub>2</sub>**OCH**<sub>3</sub>); 118.30 (-**CH=CH**<sub>2</sub>); 127.61 (aromatic **C** ortho to -**CH=CH**<sub>2</sub> and -**C=O**); 130.31 (aromatic **C** para to -**CH=CH**<sub>2</sub>, aromatic **C** meta to -**CH=CH**<sub>2</sub>); 132.30-133.17 (aromatic **C-C=O**); 135.54(-**CH=CH**<sub>2</sub>); 137.73-137.86 (aromatic **C-CH**<sub>2</sub>-); 139.76 (aromatic **C-CH=CH**<sub>2</sub>); 160.12 (aromatic **C-OCH**<sub>2</sub>**CH**<sub>2</sub>**OCH**<sub>3</sub>); 165.54-166.45 (**C=O**).

Mass Spectrometry (MS) (m/z) [M] Calcd for C<sub>36</sub>H<sub>44</sub>O<sub>12</sub>, 668.7; found, 668.3.

di-2EOBCS:  $^1\text{H}$  NMR ( $\text{CDCl}_3$ , TMS),  $\delta$ : 8.26 (s, 1H, Ar-**H**); 7.99-7.93 (m, 2H, Ar-**H**); 7.46-7.39 (m, 1H, -**CH=CH**<sub>2</sub>); 6.59 (s, 4H, Ar-**H**); 6.48 (s, 2H, Ar-**H**); 5.78-5.73 (d, 1H, -**CH=CH**<sub>2</sub>); 5.43-5.40 (d, 1H, -**CH=CH**<sub>2</sub>); 5.29-5.27 (d, 4H, -**COOCH**<sub>2</sub>-); 4.12 (t, 8H, Ar**OCH**<sub>2</sub>-); 3.85 (t, 8H, Ar**OCH**<sub>2</sub>**CH**<sub>2</sub>-); 3.71 (m, 8H, Ar**OCH**<sub>2</sub>**CH**<sub>2</sub>**OCH**<sub>2</sub>-); 3.57 (t, 8H, Ar**OCH**<sub>2</sub>**CH**<sub>2</sub>**OCH**<sub>2</sub>**CH**<sub>2</sub>-); 3.39 (s, 12H, -**OCH**<sub>3</sub>).

$^{13}\text{C}$  NMR ( $\text{CDCl}_3$ , TMS),  $\delta$ : 59.13 (-**OCH**<sub>3</sub>); 67.05 (-**COOCH**<sub>2</sub>-); 67.58 (Ar**OCH**<sub>2</sub>-); 69.69 (Ar**OCH**<sub>2</sub>**CH**<sub>2</sub>**O**-); 70.76 (-**OCH**<sub>2</sub>**CH**<sub>2</sub>**OCH**<sub>3</sub>); 71.97 (-**CH**<sub>2</sub>**OCH**<sub>3</sub>); 101.51 (aromatic **C** para to -**COOCH**<sub>2</sub>-); 107.11 (aromatic **C** ortho to -**COOCH**<sub>2</sub>- and -**OCH**<sub>2</sub>**CH**<sub>2</sub>**O**-); 117.95 (-**CH=CH**<sub>2</sub>); 128.03 (aromatic **C** ortho to -**CH=CH**<sub>2</sub> and -**C=O**); 130.30 (aromatic **C** para to -**CH=CH**<sub>2</sub>, aromatic **C** meta to -**CH=CH**<sub>2</sub>); 132.32-133.17 (aromatic **C-C=O**); 135.51(-**CH=CH**<sub>2</sub>); 137.70-137.83 (aromatic **C-CH**<sub>2</sub>-); 139.77 (aromatic **C-CH=CH**<sub>2</sub>); 160.12 (aromatic **C-OCH**<sub>2</sub>**CH**<sub>2</sub>**O**-); 165.52-166.46 (**C=O**).

Mass Spectrometry (MS) (m/z) [M] Calcd for C<sub>44</sub>H<sub>60</sub>O<sub>16</sub>, 844.9; found, 844.4.

di-3EOBCS:  $^1\text{H}$  NMR ( $\text{CDCl}_3$ , TMS),  $\delta$ : 8.26 (s, 1H, Ar-**H**); 7.99-7.93 (m, 2H, Ar-**H**); 7.46-7.39 (m, 1H, -**CH=CH**<sub>2</sub>); 6.59 (s, 4H, Ar-**H**); 6.47 (s, 2H, Ar-**H**); 5.77-5.73 (d, 1H, -**CH=CH**<sub>2</sub>); 5.43-5.41 (d, 1H, -**CH=CH**<sub>2</sub>); 5.29-5.27 (d, 4H, -**COOCH**<sub>2</sub>-); 4.11 (m, 8H, Ar**OCH**<sub>2</sub>-); 3.85 (m, 8H, Ar**OCH**<sub>2</sub>**CH**<sub>2</sub>-); 3.73 (m, 8H, Ar**OCH**<sub>2</sub>**CH**<sub>2</sub>**OCH**<sub>2</sub>-); 3.69-3.64 (m, 8H, Ar**OCH**<sub>2</sub>**CH**<sub>2</sub>**OCH**<sub>2</sub>**CH**<sub>2</sub>**OCH**<sub>2</sub>-); 3.56-3.54 (m, 8H, -**CH**<sub>2</sub>**OCH**<sub>3</sub>-); 3.37 (s, 12H, -**OCH**<sub>3</sub>).

$^{13}\text{C}$  NMR ( $\text{CDCl}_3$ , TMS),  $\delta$ : 58.96 (-**OCH**<sub>3</sub>); 67.07 (-**COOCH**<sub>2</sub>-); 67.57 (Ar**OCH**<sub>2</sub>-); 69.66 (Ar**OCH**<sub>2</sub>**CH**<sub>2</sub>**O**-); 70.57-70.84 (Ar**OCH**<sub>2</sub>**CH**<sub>2</sub>**OCH**<sub>2</sub>**CH**<sub>2</sub>**OCH**<sub>2</sub>-); 71.94 (-**CH**<sub>2</sub>**OCH**<sub>3</sub>); 101.51 (aromatic **C** para to -**COOCH**<sub>2</sub>-); 107.08 (aromatic **C** ortho to -**COOCH**<sub>2</sub>- and -**OCH**<sub>2</sub>**CH**<sub>2</sub>**O**-); 117.77 (-**CH=CH**<sub>2</sub>); 128.04 (aromatic **C** ortho to -**CH=CH**<sub>2</sub> and -**C=O**); 129.84 (aromatic **C** para to -**CH=CH**<sub>2</sub>, aromatic **C** meta to -**CH=CH**<sub>2</sub>); 132.30-133.15 (aromatic **C-C=O**); 135.56(-**CH=CH**<sub>2</sub>); 137.69-137.81 (aromatic **C-CH**<sub>2</sub>-); 139.73 (aromatic **C-CH=CH**<sub>2</sub>); 160.13 (aromatic **C-OCH**<sub>2</sub>**CH**<sub>2</sub>**O**-); 165.52-166.46 (**C=O**).

Mass Spectrometry (MS) (m/z) [M] Calcd for C<sub>54</sub>H<sub>76</sub>O<sub>20</sub>, 1021.1; found, 1020.5.

tri-1EOBCS:  $^1\text{H}$  NMR ( $\text{CDCl}_3$ , TMS),  $\delta$ : 8.25 (s, 1H, Ar-**H**); 7.97-7.90 (m, 2H, Ar-**H**); 7.44-7.37 (m, 1H, -**CH=CH**<sub>2</sub>); 6.70 (m, 4H, Ar-**H**); 5.77-5.73 (d, 1H, -**CH=CH**<sub>2</sub>); 5.43-5.40 (d, 1H, -**CH=CH**<sub>2</sub>); 5.27-5.25 (d, 4H, -**COOCH**<sub>2</sub>-); 4.16 (t, 12H, Ar**OCH**<sub>2</sub>-); 3.75-3.71 (m, 12H, -**CH**<sub>2</sub>**OCH**<sub>3</sub>); 3.43 (s, 18H, -**OCH**<sub>3</sub>).

$^{13}\text{C}$  NMR ( $\text{CDCl}_3$ , TMS),  $\delta$ : 58.80-59.10 (-**OCH**<sub>3</sub>); 67.15-67.19 (-**COOCH**<sub>2</sub>-); 69.10 (Ar**OCH**<sub>2</sub>**CH**<sub>2</sub>**O**- and meta to -**COOCH**<sub>2</sub>-); 71.11 (Ar**OCH**<sub>2</sub>- and para to -**COOCH**<sub>2</sub>-); 71.84-72.24 (-**CH**<sub>2</sub>**OCH**<sub>3</sub>); 108.66 (aromatic **C** ortho to -**OCH**<sub>2</sub>**CH**<sub>2</sub>**OCH**<sub>3</sub>); 117.80 (-**CH=CH**<sub>2</sub>); 128.19-128.45 (aromatic **C** ortho to -**CH=CH**<sub>2</sub> and -**C=O**); 130.38 (aromatic **C** para to -**CH=CH**<sub>2</sub>, aromatic **C** meta to -**CH=CH**<sub>2</sub>); 130.95-

131.07 ((aromatic C-CH<sub>2</sub>); 132.43-133.17 (aromatic C-C=O); 134.80 (-CH=CH<sub>2</sub>); 139.02 (aromatic C-OCH<sub>2</sub>CH<sub>2</sub>OCH<sub>3</sub> and para to -COOCH<sub>2</sub>-); 139.64 (aromatic C-CH=CH<sub>2</sub>); 152.88 (aromatic C-OCH<sub>2</sub>CH<sub>2</sub>OCH<sub>3</sub> and meta to -COOCH<sub>2</sub>-); 165.51-166.50 (C=O).

Mass Spectrometry (MS) (m/z) [M] Calcd for C<sub>42</sub>H<sub>56</sub>O<sub>16</sub>, 816.9; found, 816.4.

tri-2EOBCS: <sup>1</sup>H NMR (CDCl<sub>3</sub>, TMS), δ: 8.25 (s, 1H, Ar-**H**); 7.97-7.90 (m, 2H, Ar-**H**); 7.44-7.37 (m, 1H, -**CH**=CH<sub>2</sub>); 6.68 (m, 4H, Ar-**H**); 5.77-5.73 (d, 1H, -**CH**=CH<sub>2</sub>); 5.43-5.40 (d, 1H, -**CH**=CH<sub>2</sub>); 5.26-5.24 (d, 4H, -COO**CH**<sub>2</sub>-); 4.17 (t, 12H, ArO**CH**<sub>2</sub>-); 3.85-3.80 (m, 12H, ArO**CH**<sub>2</sub>**CH**<sub>2</sub>-); 3.71 (t, 12H, ArO**CH**<sub>2</sub>CH<sub>2</sub>O**CH**<sub>2</sub>-); 3.55 (t, 12H, ArO**CH**<sub>2</sub>CH<sub>2</sub>O**CH**<sub>2</sub>**CH**<sub>2</sub>-); 3.37 (s, 18H, -O**CH**<sub>3</sub>).

<sup>13</sup>C NMR (CDCl<sub>3</sub>, TMS), δ: 58.03 (-O**CH**<sub>3</sub>); 67.26 (-COO**CH**<sub>2</sub>-); 68.82 (ArO**CH**<sub>2</sub>-); 69.66 (ArO**CH**<sub>2</sub>CH<sub>2</sub>O-); 70.33-70.38 (-O**CH**<sub>2</sub>CH<sub>2</sub>O**CH**<sub>3</sub>); 71.84-71.94 (-**CH**<sub>2</sub>O**CH**<sub>3</sub>); 108.85 (aromatic C ortho to -O**CH**<sub>2</sub>CH<sub>2</sub>O-); 117.92 (-**CH**=CH<sub>2</sub>); 127.37 (aromatic C ortho to -**CH**=CH<sub>2</sub> and -C=O); 129.60 (aromatic C para to -**CH**=CH<sub>2</sub>, aromatic C meta to -**CH**=CH<sub>2</sub>); 130.87-131.20 (aromatic C-CH<sub>2</sub>); 132.25-133.11 (aromatic C-C=O); 134.51 (-**CH**=CH<sub>2</sub>); 138.32 (aromatic C-O**CH**<sub>2</sub>CH<sub>2</sub>O- and para to -COO**CH**<sub>2</sub>-); 139.61 (aromatic C-CH=CH<sub>2</sub>); 152.65 (aromatic C-O**CH**<sub>2</sub>CH<sub>2</sub>O- and meta to -COO**CH**<sub>2</sub>-); 165.48-166.27 (C=O).

Mass Spectrometry (MS) (m/z) [M] Calcd for C<sub>54</sub>H<sub>80</sub>O<sub>22</sub>, 1081.2; found, 1080.5.

tri-3EOBCS: <sup>1</sup>H NMR (CDCl<sub>3</sub>, TMS), δ: 8.25 (s, 1H, Ar-**H**); 7.98-7.91 (m, 2H, Ar-**H**); 7.44-7.37 (m, 1H, -**CH**=CH<sub>2</sub>); 6.68 (m, 4H, Ar-**H**); 5.77-5.73 (d, 1H, -**CH**=CH<sub>2</sub>); 5.43-5.40 (d, 1H, -**CH**=CH<sub>2</sub>); 5.26-5.24 (d, 4H, -COO**CH**<sub>2</sub>-); 4.16 (t, 12H, ArO**CH**<sub>2</sub>-); 3.85-3.79 (m, 12H, ArO**CH**<sub>2</sub>**CH**<sub>2</sub>-); 3.73 (m, 12H, ArO**CH**<sub>2</sub>CH<sub>2</sub>O**CH**<sub>2</sub>-); 3.65 (m, 24H, ArO**CH**<sub>2</sub>CH<sub>2</sub>O**CH**<sub>2</sub>**CH**<sub>2</sub>O**CH**<sub>2</sub>-); 3.54 (m, 12H, -**CH**<sub>2</sub>O**CH**<sub>3</sub>-); 3.37 (s, 18H, -O**CH**<sub>3</sub>).

<sup>13</sup>C NMR (CDCl<sub>3</sub>, TMS), δ: 58.28 (-O**CH**<sub>3</sub>); 67.14 (-COO**CH**<sub>2</sub>-); 68.80 (ArO**CH**<sub>2</sub>CH<sub>2</sub>O-); 69.58 (ArO**CH**<sub>2</sub>CH<sub>2</sub>-); 70.36-70.67 (ArO**CH**<sub>2</sub>CH<sub>2</sub>O**CH**<sub>2</sub>CH<sub>2</sub>O **CH**<sub>2</sub>-); 71.74-72.19 (-**CH**<sub>2</sub>O**CH**<sub>3</sub>); 108.86 (aromatic C ortho to -O**CH**<sub>2</sub>CH<sub>2</sub>O-); 117.75 (-**CH**=CH<sub>2</sub>); 127.31-128.51 (aromatic C ortho to -**CH**=CH<sub>2</sub> and -C=O); 128.93 (aromatic C para to -**CH**=CH<sub>2</sub>, aromatic C meta to -**CH**=CH<sub>2</sub>); 130.79-131.14 (aromatic C-CH<sub>2</sub>); 132.23-133.87 (aromatic C-C=O); 135.44 (-**CH**=CH<sub>2</sub>); 138.40 (aromatic C-O**CH**<sub>2</sub>CH<sub>2</sub>O- and para to -COO**CH**<sub>2</sub>-); 139.46 (aromatic C-CH=CH<sub>2</sub>); 152.61 (aromatic C-O**CH**<sub>2</sub>CH<sub>2</sub>O- and meta to -COO**CH**<sub>2</sub>-); 165.32-166.30 (C=O).

Mass Spectrometry (MS) (m/z) [M] Calcd for C<sub>66</sub>H<sub>104</sub>O<sub>28</sub>, 1345.5; found, 1344.6.

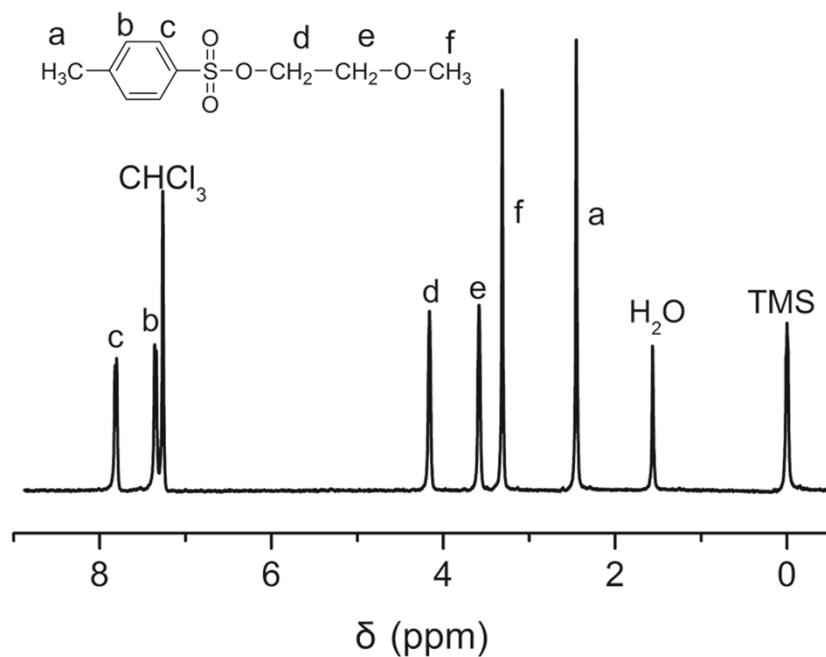

Fig. S1 <sup>1</sup>H NMR spectra of 2-methoxyethyl 4-methylbenzenesulfonate.

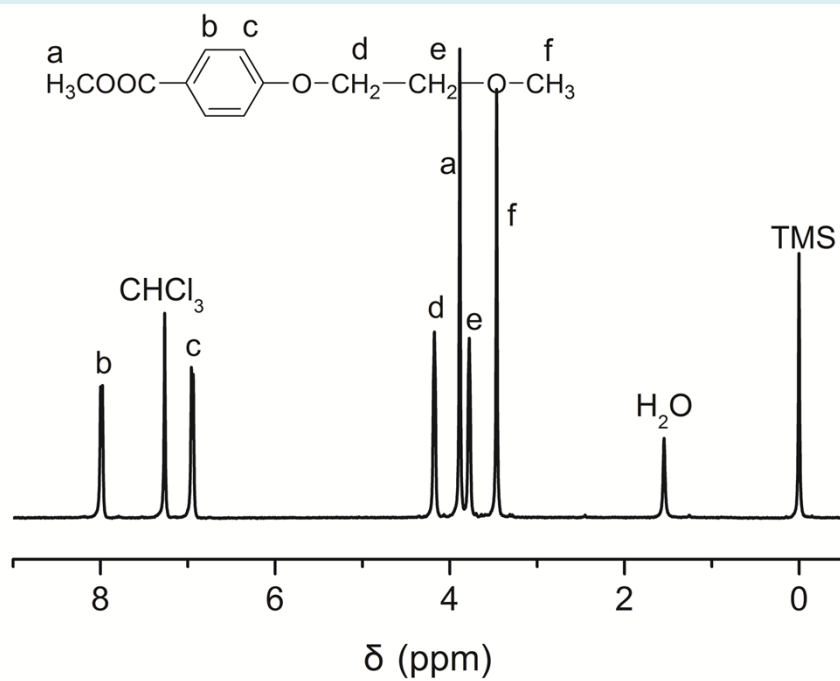

Fig. S2 <sup>1</sup>H NMR spectra of methyl 4-(2-methoxyethoxy)benzoate.

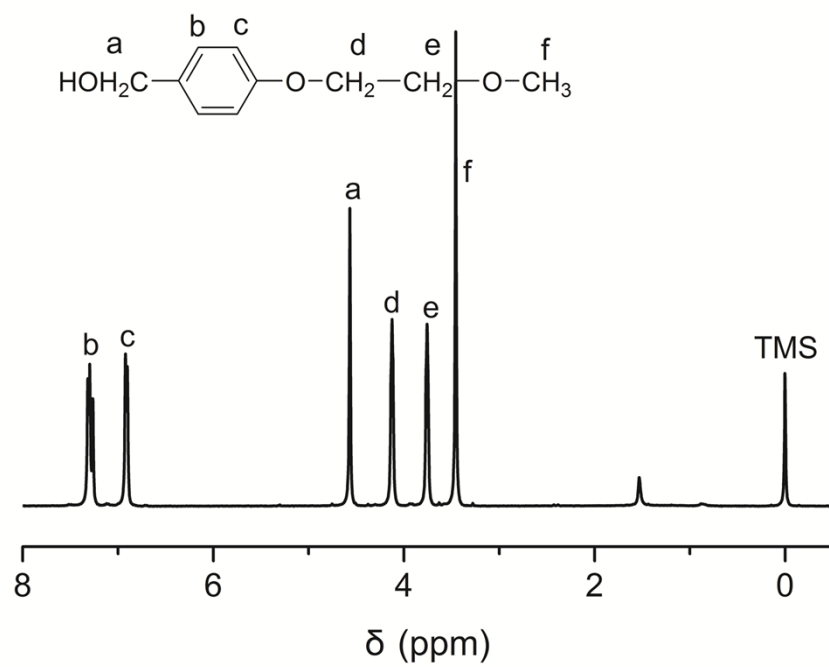

Fig. S3 <sup>1</sup>H NMR spectra of (4-(2-methoxyethoxy)phenyl)methanol.

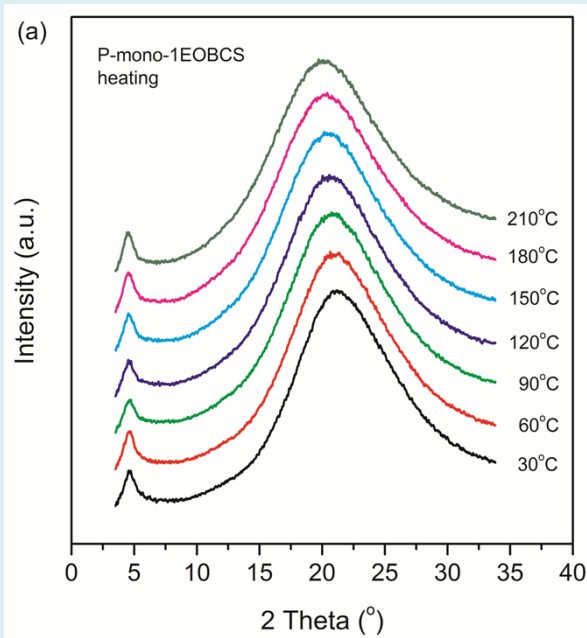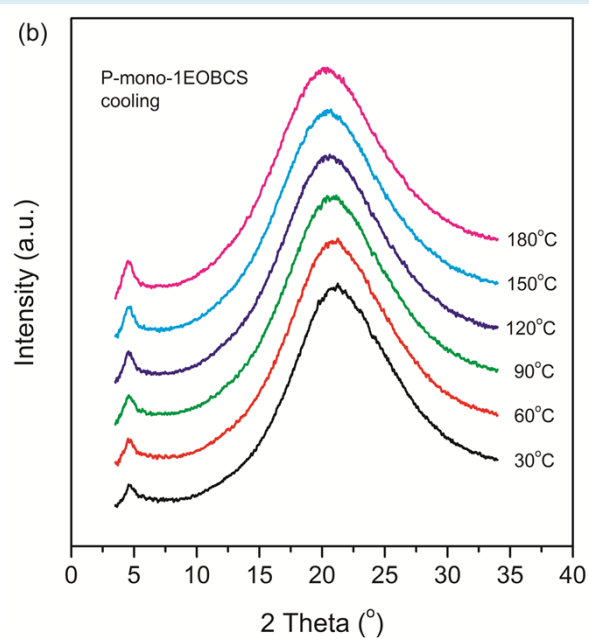

**Fig.S4** 1D WAXD patterns of the P-mono-1EOBCS during (a) the second heating process and (b) the second cooling process.

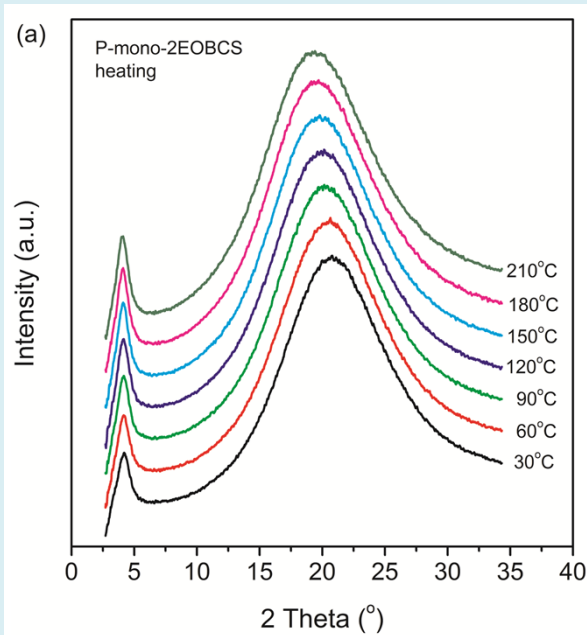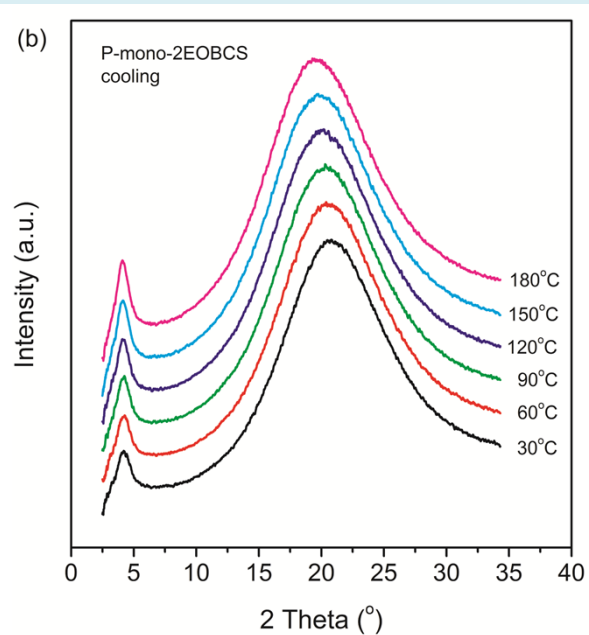

**Fig. S5** 1D WAXD patterns of the P-mono-2EOBCS during (a) the second heating process and (b) the second cooling process.

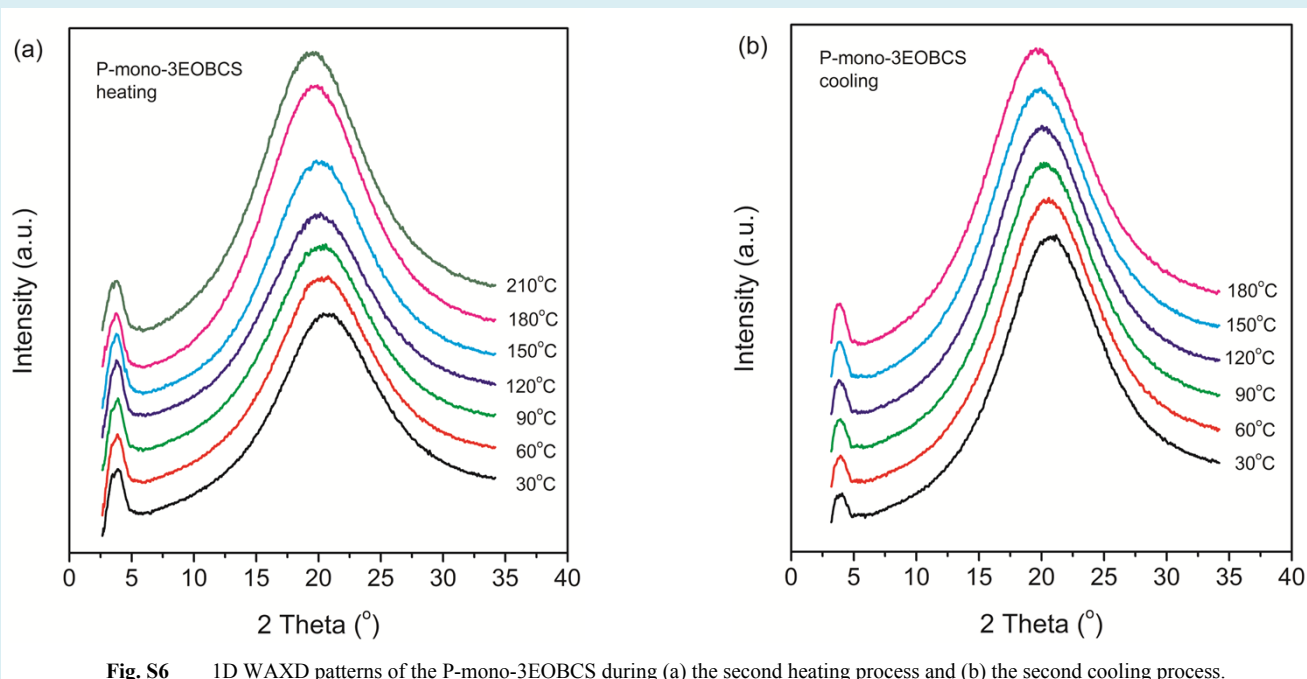

**Fig. S6** 1D WAXD patterns of the P-mono-3EOBCS during (a) the second heating process and (b) the second cooling process.

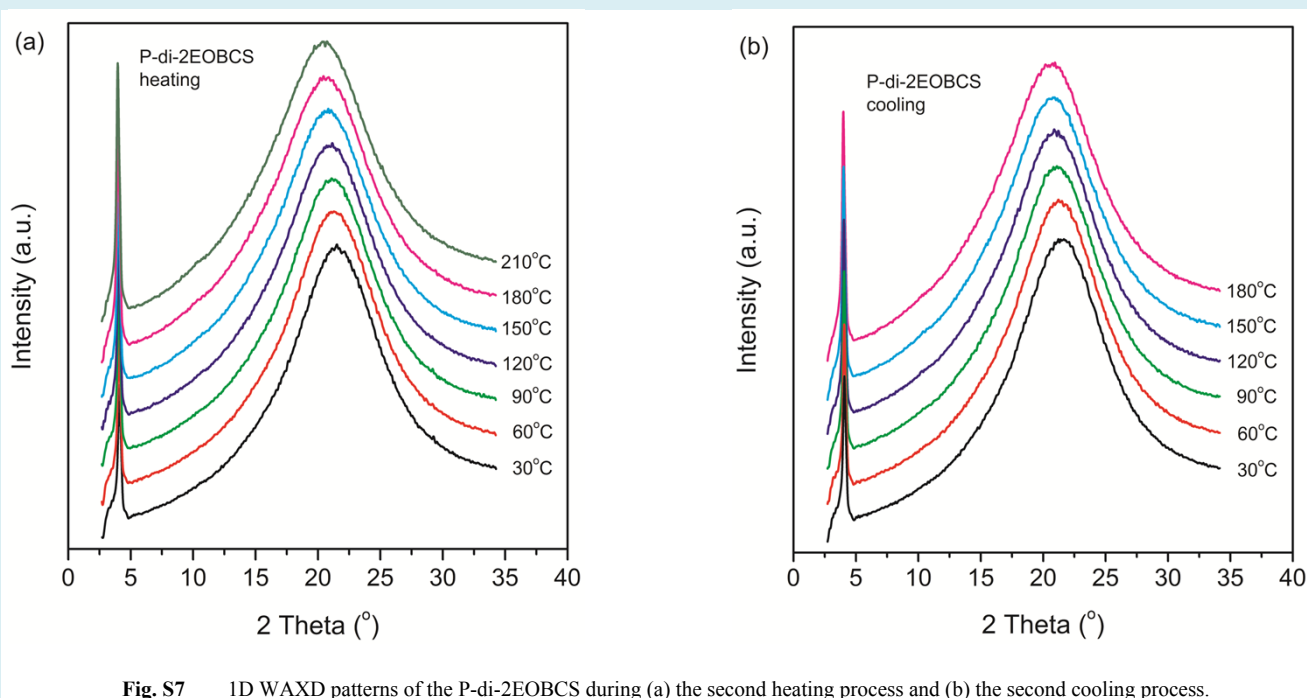

**Fig. S7** 1D WAXD patterns of the P-di-2EOBCS during (a) the second heating process and (b) the second cooling process.

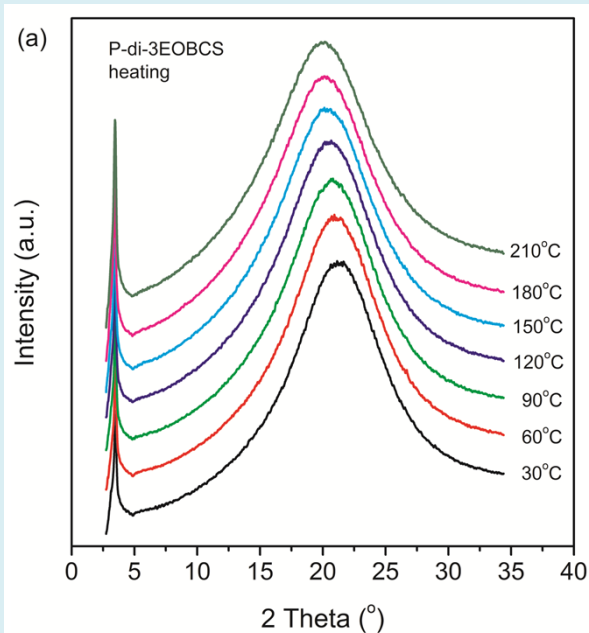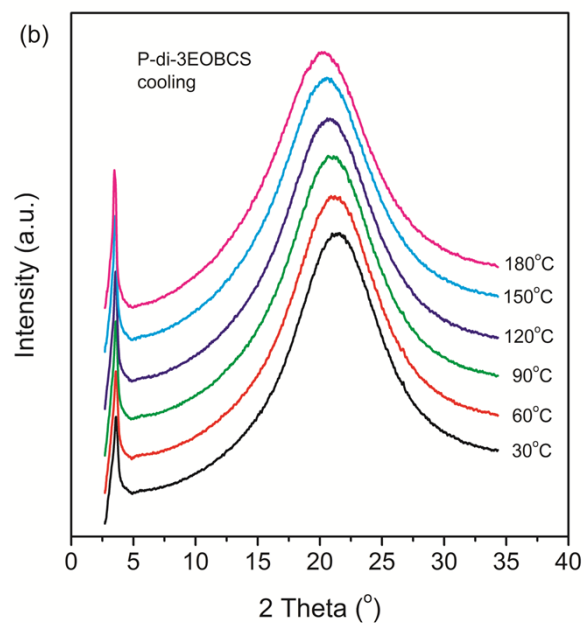

**Fig. S8** 1D WAXD patterns of the P-di-3EOBCS during (a) the second heating process and (b) the second cooling process.

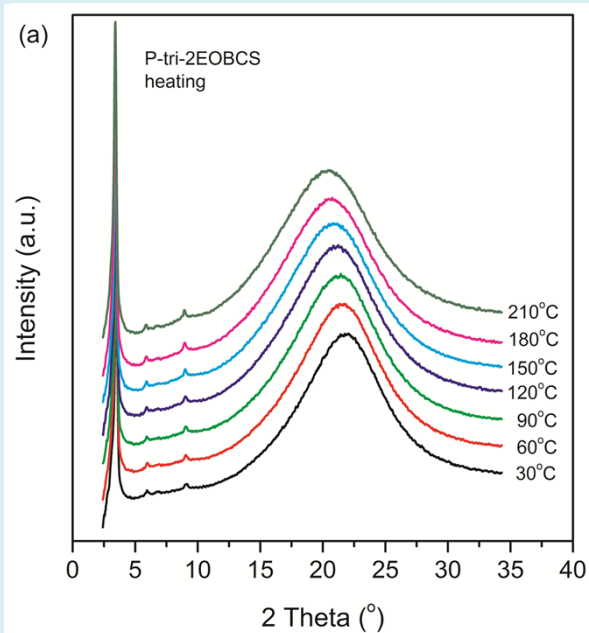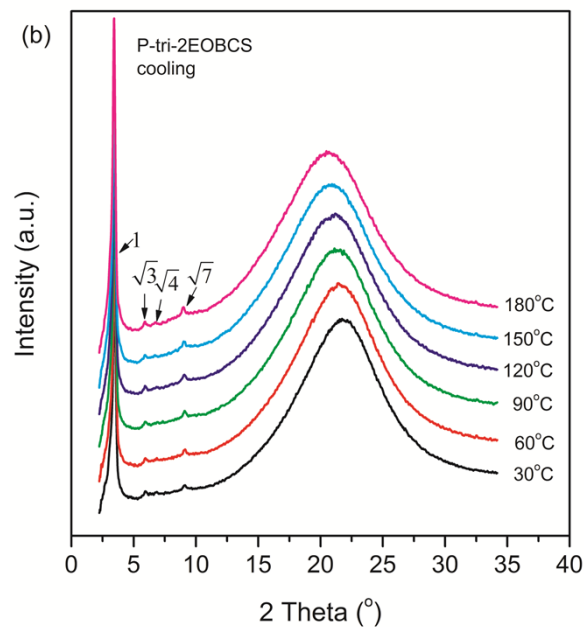

**Fig. S9** 1D WAXD patterns of the P-tri-2EOBCS during (a) the second heating process and (b) the second cooling process.

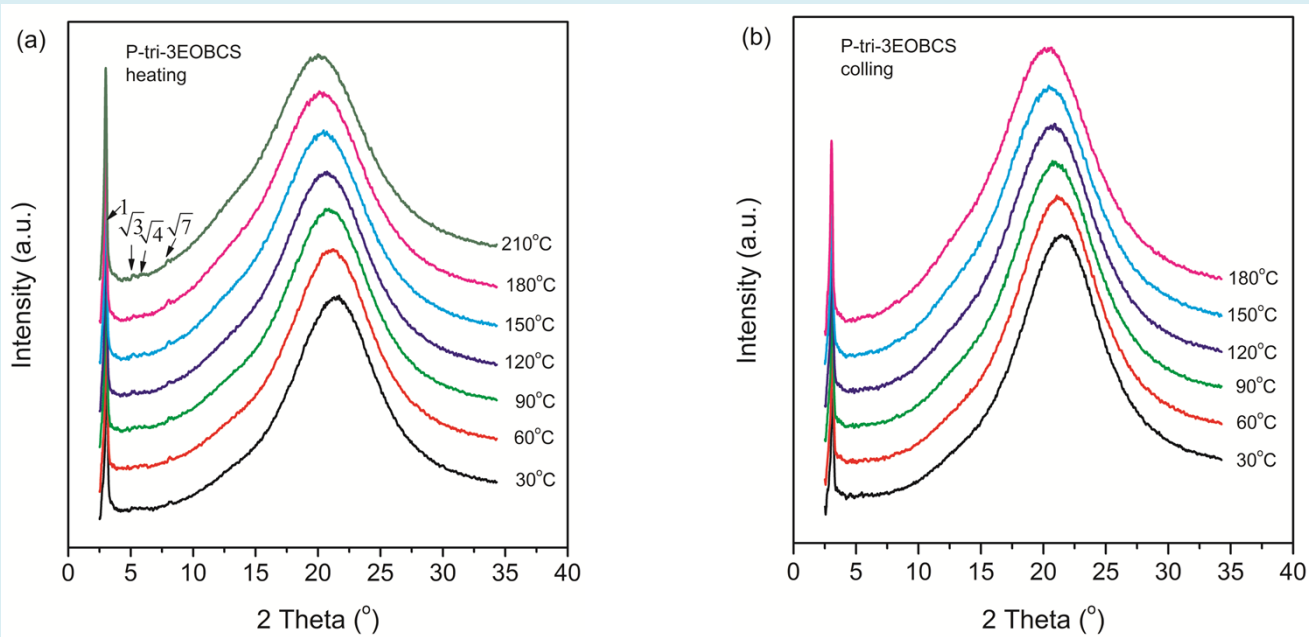

**Fig. S10** 1D WAXD patterns of the P-tri-3EOBCS during (a) the second heating process and (b) the second cooling process.



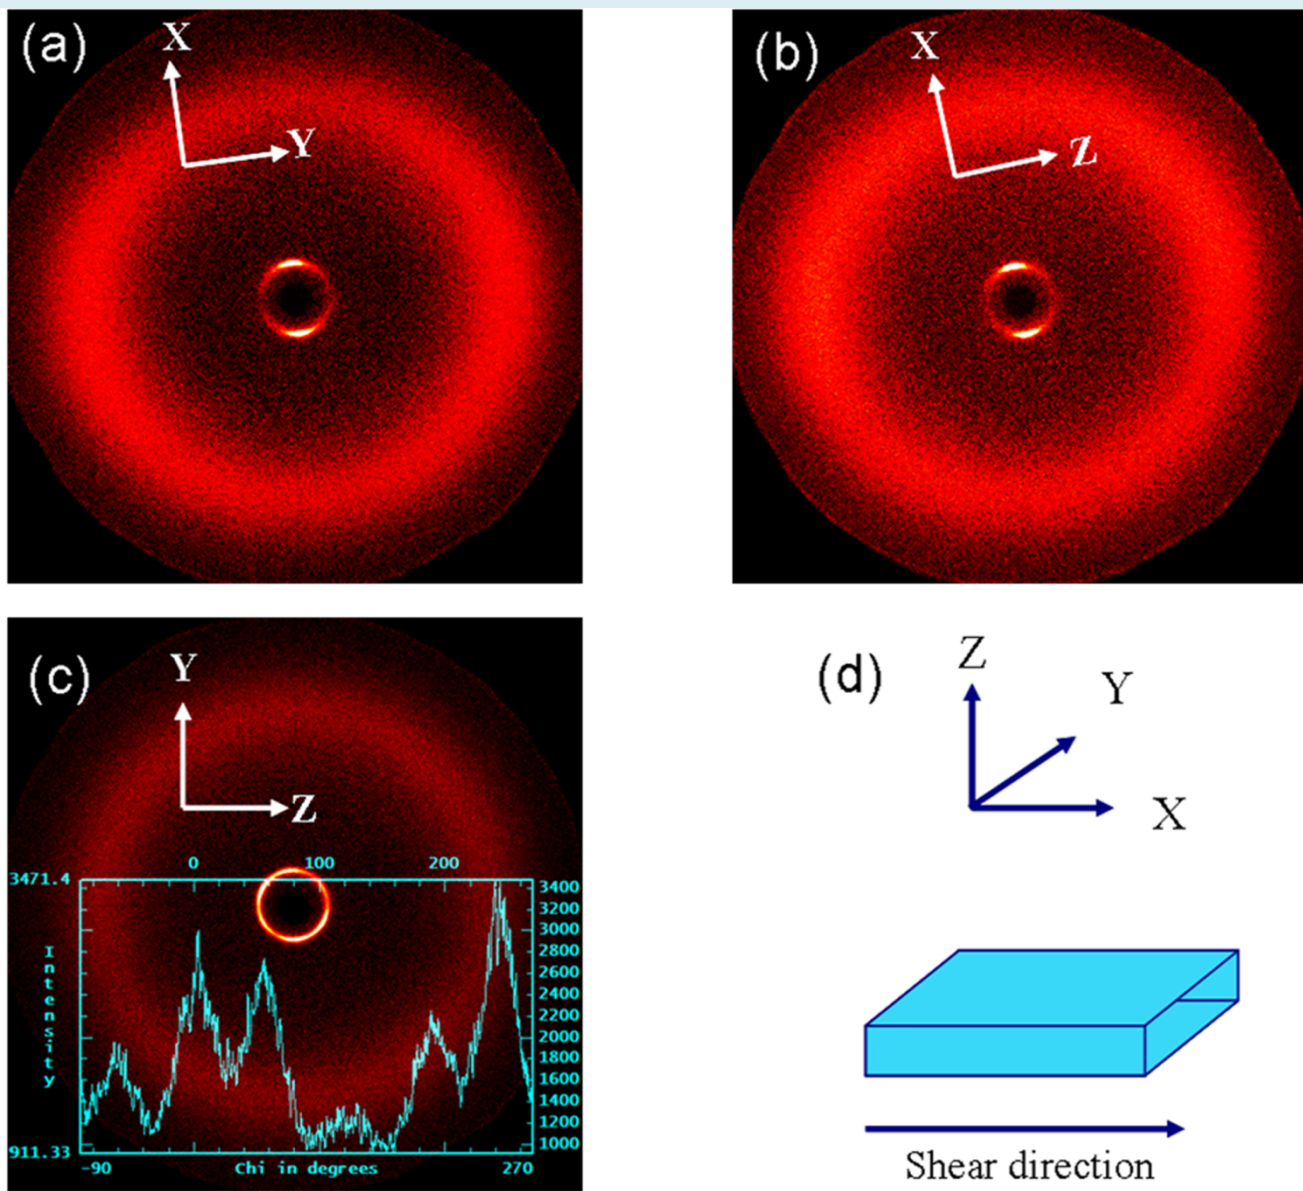

Fig. S11 2D WAXD patterns of a sheared P-di-2EOBCS sample recorded with the X-ray incident beam along Z (a), Y (b), and X (c) directions and the shearing geometry (d).
